# Supplementary material for: Adsorption of Recombinant Human β-Defensin 2 and Two Mutants on Mesoporous Silica Nanoparticles and Its Effect against Clavibacter michiganensis subsp. michiganensis
Source: MDPI journal article supplement (doi:10.3390/nano11082144), 2021-08-23
Supplement: s1 [file s1]

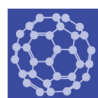

## Supplementary Information

# Adsorption of Recombinant Human $\beta$ -Defensin 2 and Two Mutants on Mesoporous Silica Nanoparticles and Its Effect against *Clavibacter michiganensis* subsp. *michiganensis*

Gabriel Marcelino-Pérez <sup>1</sup>, Roberto Ruiz-Medrano <sup>2</sup>, Salvador Gallardo-Hernández <sup>3,\*</sup> and Beatriz Xoconostle-Cázares <sup>2,\*</sup>

<sup>1</sup> Programa de Doctorado en Nanociencias y Nanotecnología, Centro de Investigación y de Estudios Avanzados del Instituto Politécnico Nacional, Av. IPN 2508, Zacatenco 07360, Ciudad de México, Mexico; gabriel.marcelino@cinvestav.mx

<sup>2</sup> Departamento de Biotecnología y Bioingeniería, Centro de Investigación y de Estudios Avanzados del Instituto Politécnico Nacional, Av. IPN 2508, Zacatenco 07360, Ciudad de México, Mexico; rmedrano@cinvestav.mx

<sup>3</sup> Departamento de Física, Centro de Investigación y de Estudios Avanzados del Instituto Politécnico Nacional, Av. IPN 2508, Zacatenco 07360, Ciudad de México, Mexico

\* Correspondence: sgallardo@fis.cinvestav.mx (S.G.-H.); bxoconos@cinvestav.mx (B.X.-C.)

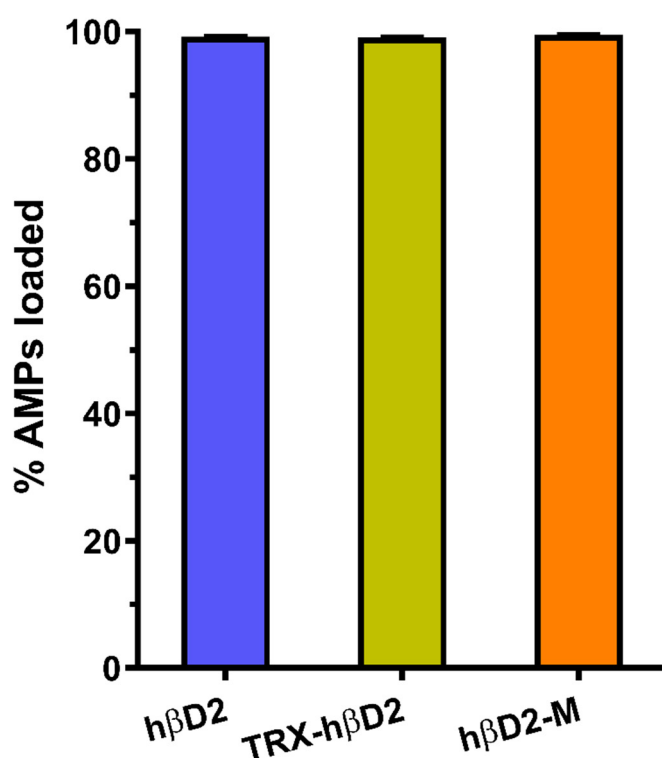

Figure S1. AMPs loaded onto MSN5.4 after 16 h incubation to 4 °C.

Table S1. Different treatments performed for the synthesis of MSN.

| Reagents                    | Treatment 1<br>(MSN5.4) | Treatment 2<br>(MSN 4.8) | Treatment 3<br>(MSN0.9) | Treatment 4<br>(MSN0.9') |
|-----------------------------|-------------------------|--------------------------|-------------------------|--------------------------|
| F127<br>(O106PO70EO10<br>6) | 50 mg                   | 50 mg                    | 50 mg                   | 50 mg                    |

|                                                |         |         |           |           |
|------------------------------------------------|---------|---------|-----------|-----------|
| DHMA<br>( <i>N, N</i> -dimethylhexadecylamine) | 0.4 mL  | 0.8 mL  | 0.4 mL    | 0.8 mL    |
| CTAB<br>(cetyltrimethylammonium bromide)       | 0.5 g   | 0.5 g   | 0.5 g     | 0.5 g     |
| H <sub>2</sub> O                               | 240 mL  | 240 mL  | 240 mL    | 240 mL    |
| NaOH (2 M)                                     | 1.75 mL | 1.75 mL | 1.75 mL   | 1.75 mL   |
| TEOS (Tetraethyl orthosilicate)                | 2.5 mL  | 2.5 mL  | 1.1875 mL | 1.1875 mL |

**Table S2.** Physicochemical characteristics of AMPs.

| Protein    | Sequence                                                                                                                                                                                                                                                                      | Theoretical weight | Isoelectric point <sup>a</sup> | Dimensions                         |
|------------|-------------------------------------------------------------------------------------------------------------------------------------------------------------------------------------------------------------------------------------------------------------------------------|--------------------|--------------------------------|------------------------------------|
| hβD2       | GAMGIGDPVTC<br>LKSGAICHPVF<br>CPR-<br>RYKQIGTCGLP<br>GTKCCKKP                                                                                                                                                                                                                 | 4.6 kDa            | 9.3                            | 2.3 × 3.45 × 2.45 nm <sup>3</sup>  |
| TRX-hβD2-M | MKHHHHHHHP<br>MSDKIIHLTDDS<br>FD<br>TDVL-<br>KADGAILVDF-<br>WAEWCGPC<br>KMIAPILDEI-<br>ADEYQGKLT-<br>VAKLNI<br>DQNPGTAP-<br>KYGIRGIPT-<br>LLLFKNG<br>EVAAT-<br>KVGALSKGQLK<br>EFLDANL<br>AGSGSGSEN-<br>LYFQGAMG-<br>GIGDP<br>VTCLKSGAICH<br>PVFCPRRYKQIG<br>TCGLPGTKCCK<br>KR | 18.9 kDa           | 8.1                            | 3.97 × 7 × 3.08 nm <sup>3</sup>    |
| hβD2-M     | GAMG-<br>GIGDPVTCLKS<br>GAICHPVF<br>CPR-<br>RYKQIGTCGLP<br>GTKCCKKR                                                                                                                                                                                                           | 4.7 kDa            | 9.5                            | 2.74 × 3.25 × 2.28 nm <sup>3</sup> |

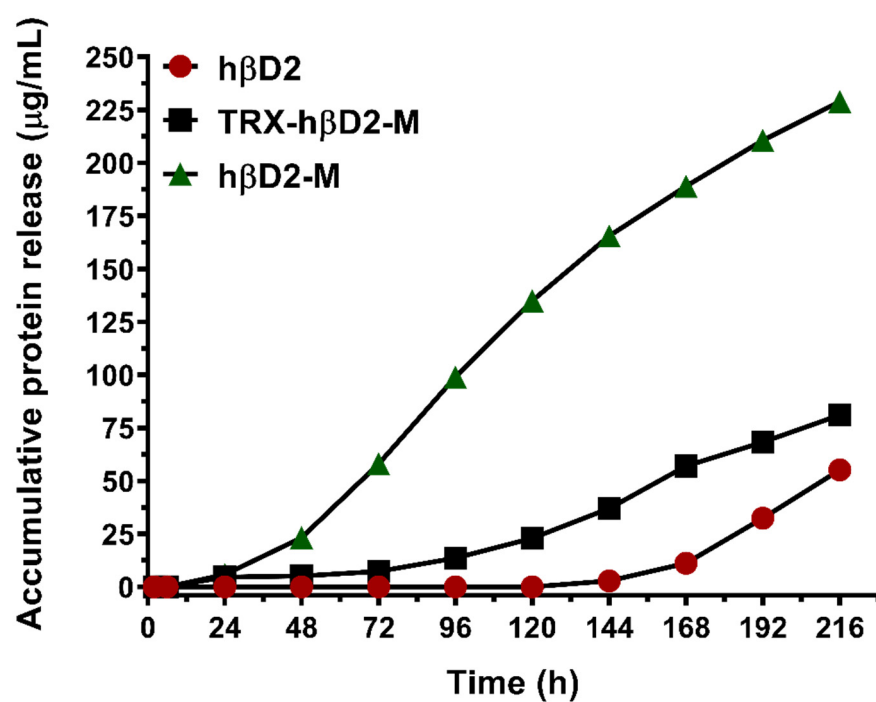

Figure S2. Cumulative release of AMPs with respect to time.

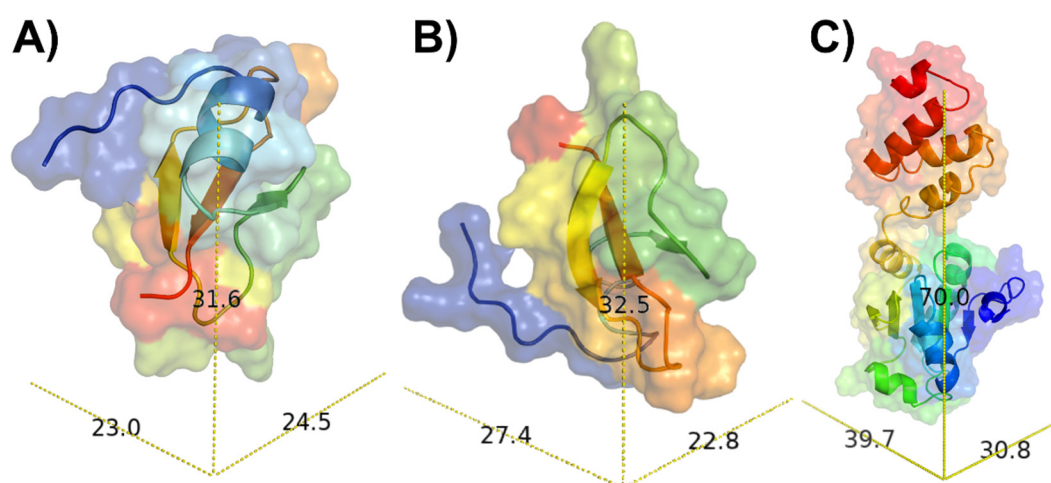

Figure S3. AMPS measurements with the Pymol software.
